# Supplementary material
Source: PubMed Central journal article supplement (PMC9531053)
Supplement: NIHMS1836065-supplement-Supplemental__3_page_limit_.pdf [file NIHMS1836065-supplement-Supplemental__3_page_limit_.pdf]

**Lung Nodule Malignancy Prediction in Sequential CT Scans: Summary of ISBI 2018 Challenge**

Yoganand Balagurunathan<sup>1,\*</sup>, Andrew Beers<sup>2,#</sup>, Michael McNitt-Gray<sup>3,#</sup>, Lubomir Hadjiiski<sup>4,#</sup>, Sandy Napel<sup>5,#</sup>, Dmitry Goldgof<sup>6,#</sup> (*IEEE Fellow*), Gustavo Perez<sup>7</sup>, Pablo Arbelaez<sup>7</sup>, Alireza Mehrtash<sup>8,9</sup>, Tina Kapur<sup>9</sup>, Ehwa Yang<sup>10</sup>, Jung Won Moon<sup>11</sup>, Gabriel Bernardino<sup>12</sup>, Ricard Delgado-Gonzalo<sup>13</sup>, M. Mehdi Farhangi<sup>14,19</sup>, Amir A. Amini<sup>14,15</sup> (*IEEE Fellow*), Renkun Ni<sup>16</sup>, Xue Feng<sup>16,17</sup>, Aditya Bagari<sup>18</sup>, Kiran Vaidhya<sup>18</sup>, Benjamin Veasey<sup>14,15</sup>, Wiem Safta<sup>19</sup>, Hichem Frigui<sup>19</sup>, Joseph Enguehard<sup>20</sup>, Ali Gholipour<sup>20</sup>, Laura Silvana Castillo<sup>21</sup>, Laura Alexandra Daza<sup>21</sup>, Paul Pinsky<sup>22,#</sup>, Jayashree Kalpathy-Cramer<sup>2,#</sup>, Keyvan Farahani<sup>23,\*</sup>.

<sup>1</sup>Dept. of Machine Learning, H Lee Moffitt Cancer Center (MCC), Tampa, FL. <sup>2</sup>Massachusetts General Hospital (MGH), MA. <sup>3</sup>University of California Los Angeles (UCLA), CA. <sup>4</sup>University of Michigan (UMICH), MI. <sup>5</sup>Dept. of Radiology, School of Medicine, Stanford University (SU), CA. <sup>6</sup>University of South Florida (USF), FL. <sup>7</sup>Biomedical computer vision lab (BCV), <sup>21</sup>Department of Biomedical Engineering, Universidad de los Andes, Colombia. <sup>8</sup>Robotics and Control Laboratory (RCL), Department of Electrical and Computer Engineering, University of British Columbia, Vancouver, BC. <sup>9</sup>Surgical Planning Laboratory (SPL), Radiology Department, Brigham and Women's Hospital, Boston, MA, 02130. <sup>10</sup>Sungkyunkwan University School of Medicine, Seoul 06351, Korea. <sup>11</sup>Human Medical Imaging & Intervention Center, Seoul 06524, Korea. <sup>12</sup>Universitat Pompeu Fabra, Barcelona, Spain. <sup>13</sup>Centre Suisse d'Électronique et de Microtechnique, Neuchâtel, Switzerland. <sup>14</sup>Medical Imaging Laboratory, <sup>15</sup>Electrical and Computer Engineering Department, University of Louisville, Louisville, KY. USA. <sup>16</sup>Spingbok Inc. <sup>17</sup>Department of Biomedical Engineering, University of Virginia, Charlottesville. <sup>18</sup>Predible Health Inc, India. <sup>19</sup>Computer Engineering and Computer Science, University of Louisville. <sup>20</sup>Department of Radiology, Boston Children's Hospital, and Harvard Medical School. <sup>21</sup>Department of Biomedical Engineering, Universidad de los Andes, Bogota, Colombia. <sup>22</sup>Division of Cancer Prevention, <sup>23</sup>Center for Biomedical Informatics and Information Technology, National Cancer Institute (NCI), Washington DC.

#Challenge organizing team

\*Corresponding Authors: Drs. K. Farahani/ Y. Balagurunathan: farahank@mail.nih.gov/ yogab@moffitt.org.

**Supplemental Figure SF1.** Receiver operator characteristics of various estimates of change in volume and percent change in volume by different participants (reproduced from prior publication published in *Medical Phy. 45(3) 2018*).

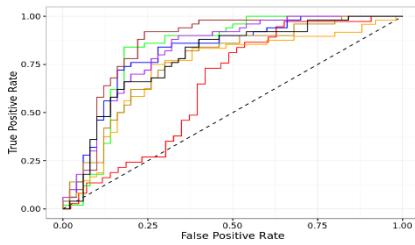

**Supplemental Figure SF2.** ROC curve shows Volume change measurement from the teams compared to organizers estimates

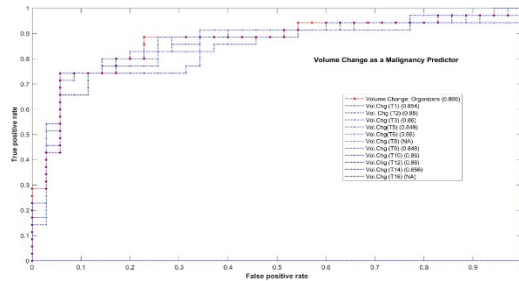

**Table ST1.** Nodule volume at individual time points (at time-t1 & t2) and change in volume as an estimator malignancy status. Performance of the team's volume estimates is compared to organizers volume and size measurements.

| #                             | TEAM                                                         | AUC                           |                               |                                                             |
|-------------------------------|--------------------------------------------------------------|-------------------------------|-------------------------------|-------------------------------------------------------------|
|                               |                                                              | Volume at time-t <sub>1</sub> | Volume at time-t <sub>2</sub> | Change in Volume (at time-t <sub>1</sub> & t <sub>2</sub> ) |
| 1                             | Team T1                                                      | 0.637                         | 0.824                         | 0.854                                                       |
| 2                             | Team T2                                                      | 0.674                         | 0.843                         | 0.85                                                        |
| 3                             | Team T3                                                      | 0.654                         | 0.828                         | 0.86                                                        |
| 4                             | Team T5                                                      | 0.675                         | 0.834                         | 0.849                                                       |
| 5                             | Team T6                                                      | 0.656                         | 0.829                         | 0.86                                                        |
| 6                             | Team T8                                                      | 0.793                         | 0.793                         | **                                                          |
| 7                             | Team T9                                                      | 0.671                         | 0.836                         | 0.848                                                       |
| 8                             | Team T10                                                     | 0.656                         | 0.829                         | 0.86                                                        |
| 9                             | Team T12                                                     | 0.656                         | 0.829                         | 0.86                                                        |
| 10                            | Team T14                                                     | 0.674                         | 0.838                         | 0.856                                                       |
| 11                            | Team T16                                                     | *                             | *                             | *                                                           |
| <b>Reference (Organizers)</b> |                                                              |                               |                               |                                                             |
| a                             | Volume                                                       | 0.672                         | 0.839                         | 0.856                                                       |
| c                             | Nodule Size                                                  | 0.694                         | 0.824                         | 0.76                                                        |
| d                             | <b>Volume Change (or Vol. Chg) (Train on 30; Test on 70)</b> | 0.866                         |                               |                                                             |

\* Not reported  
 \*\* Not available (same volume values reported for time -t1 & time-t2).

**Supplemental Table ST2.** Participating team’s performance comparison. (a)  
Table shows predictors range, optimal statistics (sensitivity, specificity), AUC with CI.

| Supplemental Table ST2. (a) |               |                                    |             |             |                     |
|-----------------------------|---------------|------------------------------------|-------------|-------------|---------------------|
|                             | Teams         | Malignancy Scores Range (min, max) | Sensitivity | Specificity | AUC with CI         |
| 1                           | T1            | 0.592(0.405-0.996)                 | 0.857       | 0.886       | 0.913 [0.844,0.982] |
| 2                           | T2            | 0.896(0.104-1)                     | 0.714       | 0.971       | 0.897 [0.822,0.972] |
| 3                           | T3            | 1(0-1)                             | 0.714       | 0.943       | 0.879 [0.797,0.962] |
| 4                           | T5            | 1(0-1)                             | 0.714       | 0.971       | 0.868 [0.778,0.958] |
| 5                           | T6            | 1(0-1)                             | 0.714       | 1           | 0.867 [0.778,0.956] |
| 6                           | T8            | 0.874(0.123-0.998)                 | 0.686       | 0.943       | 0.855 [0.761,0.949] |
| 7                           | T9            | 0.906(0.001-0.907)                 | 0.571       | 1           | 0.854 [0.764,0.943] |
| 8                           | T10           | 0.989(0-0.989)                     | 0.686       | 0.914       | 0.848 [0.756,0.941] |
| 9                           | T12           | 0.92(0-0.92)                       | 0.743       | 0.886       | 0.809 [0.697,0.92]  |
| 10                          | T14           | 0.97(0.021-0.991)                  | 0.629       | 0.914       | 0.789 [0.678,0.901] |
| 11                          | T16           | 0.992(0-0.992)                     | 0.857       | 0.486       | 0.698 [0.572,0.823] |
| 12                          | Volume Change |                                    | 0.743       | 0.943       | 0.866 [0.773,0.96]  |

**Supplemental Table- ST3.** Significance testing of participants predictors assessed using Delong’s statistics.

| A. Delong’s P-value |    |        |        |        |        |        |         |        |        |        |        |        |
|---------------------|----|--------|--------|--------|--------|--------|---------|--------|--------|--------|--------|--------|
|                     | T1 | T2     | T3     | T5     | T6     | T8     | T9      | T10    | T12    | T14    | T16    | VolChg |
| T1                  | 0  | 0.6481 | 0.4221 | 0.1987 | 0.2470 | 0.0842 | 0.0867  | 0.0754 | 0.0237 | 0.0049 | 0.0031 | 0.1932 |
| T2                  | 0  | 0      | 0.6385 | 0.2136 | 0.4005 | 0.1946 | 0.1865  | 0.1331 | 0.0590 | 0.0120 | 0.0056 | 0.4124 |
| T3                  | 0  | 0      | 0      | 0.8090 | 0.7483 | 0.5626 | 0.5213  | 0.4426 | 0.1782 | 0.0527 | 0.0161 | 0.8023 |
| T5                  | 0  | 0      | 0      | 0      | 0.9818 | 0.6919 | 0.6902  | 0.5612 | 0.2034 | 0.0610 | 0.0253 | 0.9679 |
| T6                  | 0  | 0      | 0      | 0      | 0      | 0.6647 | 0.6436  | 0.6369 | 0.1990 | 0.0791 | 0.0211 | 0.9867 |
| T8                  | 0  | 0      | 0      | 0      | 0      | 0      | 0.97693 | 0.8586 | 0.2941 | 0.0773 | 0.0558 | 0.7978 |
| T9                  | 0  | 0      | 0      | 0      | 0      | 0      | 0       | 0.8792 | 0.3049 | 0.1257 | 0.0336 | 0.8064 |
| T10                 | 0  | 0      | 0      | 0      | 0      | 0      | 0       | 0      | 0.4226 | 0.1186 | 0.0536 | 0.6315 |
| T12                 | 0  | 0      | 0      | 0      | 0      | 0      | 0       | 0      | 0      | 0.6948 | 0.1754 | 0.3098 |
| T14                 | 0  | 0      | 0      | 0      | 0      | 0      | 0       | 0      | 0      | 0      | 0.2685 | 0.1466 |
| T16                 | 0  | 0      | 0      | 0      | 0      | 0      | 0       | 0      | 0      | 0      | 0      | 0.0413 |
| VolChg              | 0  | 0      | 0      | 0      | 0      | 0      | 0       | 0      | 0      | 0      | 0      | 0      |

**Supplemental Table- ST4.** Teams re-ranking based on TPR (sensitivity) and FPR(1-Specificity) at different cut off values. A) Teams with highest TPR (sensitivity) for a fixed FPR (1-specificity), B) Teams with lowest FPR (1-specificity) for a fixed TPR (sensitivity).

| A. Ranking based on ‘Highest’ TPR (Sensitivity) for a set FPR (1-Specificity) |                     |         |         |              |         |         |         |             |        |
|-------------------------------------------------------------------------------|---------------------|---------|---------|--------------|---------|---------|---------|-------------|--------|
| Rank                                                                          | FPR (1-Specificity) |         |         |              |         |         |         |             |        |
|                                                                               | 0.01                | 0.03    | 0.05    | 0.1          | 0.15    | 0.20    | 0.25    | 0.30        |        |
| 1                                                                             | T6                  | T2 (#)  | T2 (#)  | T1 (#)       | T1      | T1      | T1      | T1          | T1     |
| 2                                                                             | T9                  | T5 (#)  | T5 (#)  | T5 (#)       | Vol.Chg | Vol.Chg | Vol.Chg | T2 (#)      | T2 (#) |
| 3                                                                             | T5                  | T6 (#)  | T6 (#)  | T2 (\$)      | T2 (#)  | T2      | T2 (#)  | T8(#)       |        |
| 4                                                                             | T2                  | T3 (\$) | T3 (\$) | Vol.Chg (\$) | T3 (#)  | T3 (#)  | T3(#)   | Vol.Chg (#) |        |
| 5                                                                             | T3                  | T9 (\$) | T9 (\$) | T3           | T5 (#)  | T5 (#)  | T8(#)   | T3          |        |
| 6                                                                             | T8                  | T8      | T8      | T6           | T6      | T8 (#)  | T5      | T6          |        |
| 7                                                                             | T1                  | T1      | T1      | T8           | T8      | T12(#)  | T12     | T10         |        |
| 8                                                                             | T14                 | Vol.Chg | Vol.Chg | T12          | T12     | T6      | T6      | T12         |        |
| 9                                                                             | T10                 | T14     | T14     | T10          | T10     | T10     | T9      | T5          |        |
| 10                                                                            | Vol.Chg             | T10     | T10     | T14          | T9      | T9      | T10     | T9          |        |
| 11                                                                            | T12                 | T16     | T16     | T9           | T14     | T14     | T14     | T14         |        |
| 12                                                                            | T16                 | T12     | T12     | T16          | T16     | T16     | T16     | T16         |        |

|                                                                              |  |
|------------------------------------------------------------------------------|--|
| B. Ranking based on ‘Lowest’ FPR (1-Specificity) for a set TPR (sensitivity) |  |
|------------------------------------------------------------------------------|--|

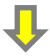

| Rank | TPR (Sensitivity) |          |          |         |         |          |         |         |
|------|-------------------|----------|----------|---------|---------|----------|---------|---------|
|      | 0.99              | 0.97     | 0.95     | 0.90    | 0.85    | 0.8      | 0.75    | 0.7     |
| 1    | T1                | T2       | T2       | T1      | T1      | T1       | T1 (#)  | T6      |
| 2    | T6                | T1       | T1       | T2      | T2      | Vol.Chg  | T5 (#)  | T2 (#)  |
| 3    | T10               | T5 (#)   | T5 (#)   | T3      | T3 (#)  | T8       | T2 (\$) | T5 (#)  |
| 4    | T2                | T9 (#)   | T9 (#)   | T9      | T9 (#)  | T2       | T3 (\$) | T1 (\$) |
| 5    | T3 (#)            | T3 (\$)  | T3 (\$)  | T10     | T10 (#) | T3 (\$)  | Vol.Chg | T3 (\$) |
| 6    | T8 (#)            | T16 (\$) | T16 (\$) | Vol.Chg | Vol.Chg | T10 (\$) | T8      | Vol.Chg |
| 7    | T9 (#)            | T10      | T10      | T5      | T5      | T5       | T12     | T8      |
| 8    | T14 (#)           | T6       | T6       | T6      | T8      | T9       | T6      | T12     |
| 9    | T16 (#)           | Vol.Chg  | Vol.Chg  | T16     | T6      | T6       | T9      | T10     |
| 10   | T5                | T8       | T12      | T12     | T12     | T12      | T10     | T9      |
| 11   | T12               | T14      | T8       | T8      | T16     | T14      | T14     | T14     |
| 12   | Vol.Chg           | T12      | T14      | T14     | T14     | T16      | T16     | T16     |

**Note:** We highlight same predictive values (TPR or FPR) on the column side, in the tables using a symbol in the list (#, \$). Where teams with same symbol type in the parenthesis will have same predictive values, in their respective columns. Not to be compared across the columns.

**Supplemental Table- ST5.** Partial AUC to compare the performance of the participating team’s predictor contrasted with the volume change. A) different intervals of FPR B) different intervals of TPR.

a)

| Teams         | Partial Area ( $pAUC$ )      |        |        |        |        |        |        |        |
|---------------|------------------------------|--------|--------|--------|--------|--------|--------|--------|
|               | FPR intervals with TPR [0,1] |        |        |        |        |        |        |        |
|               | ≤0.05                        | ≤0.10  | ≤0.15  | ≤0.20  | ≤0.25  | ≤0.3   | ≤0.35  | ≤0.4   |
| T1            | 0.0106                       | 0.0465 | 0.0931 | 0.142  | 0.1665 | 0.2171 | 0.271  | 0.3249 |
| T2            | 0.0139                       | 0.0555 | 0.0988 | 0.1429 | 0.1657 | 0.2114 | 0.2612 | 0.3135 |
| T3            | 0.0131                       | 0.0498 | 0.0922 | 0.1363 | 0.1584 | 0.2041 | 0.2506 | 0.3012 |
| T5            | 0.0155                       | 0.0571 | 0.1012 | 0.1453 | 0.1673 | 0.2114 | 0.2555 | 0.3037 |
| T6            | 0.0204                       | 0.0612 | 0.1029 | 0.1453 | 0.1665 | 0.2098 | 0.2555 | 0.302  |
| T8            | 0.0131                       | 0.0482 | 0.0898 | 0.1322 | 0.1543 | 0.2008 | 0.2482 | 0.2963 |
| T9            | 0.0163                       | 0.0498 | 0.0841 | 0.1224 | 0.1429 | 0.1861 | 0.231  | 0.2808 |
| T10           | 0.0057                       | 0.0343 | 0.0735 | 0.1135 | 0.1347 | 0.1771 | 0.2237 | 0.2735 |
| T12           | 0.0008                       | 0.0188 | 0.06   | 0.1024 | 0.1245 | 0.1686 | 0.2139 | 0.2367 |
| T14           | 0.0082                       | 0.0384 | 0.0743 | 0.111  | 0.1314 | 0.1731 | 0.2155 | 0.258  |
| T16           | 0                            | 0.0139 | 0.0343 | 0.058  | 0.0702 | 0.0963 | 0.1257 | 0.1576 |
| Volume Change | 0.0041                       | 0.04   | 0.0824 | 0.1282 | 0.1518 | 0.1992 | 0.2465 | 0.2963 |

b)

| Teams         | Partial Area ( $pAUC$ )      |        |        |        |        |        |        |        |
|---------------|------------------------------|--------|--------|--------|--------|--------|--------|--------|
|               | TPR intervals with FPR [0,1] |        |        |        |        |        |        |        |
|               | ≥0.95                        | ≥0.90  | ≥0.85  | ≥0.80  | ≥0.75  | ≥0.7   | ≥0.65  | ≥0.6   |
| T1            | 0.0188                       | 0.0527 | 0.0912 | 0.1355 | 0.1804 | 0.2273 | 0.2745 | 0.3216 |
| T2            | 0.0153                       | 0.0449 | 0.0792 | 0.1143 | 0.1561 | 0.2033 | 0.2518 | 0.3004 |
| T3            | 0.0108                       | 0.0384 | 0.07   | 0.1037 | 0.1447 | 0.1898 | 0.2369 | 0.2841 |
| T5            | 0.009                        | 0.0294 | 0.0543 | 0.0865 | 0.1249 | 0.1722 | 0.2208 | 0.2694 |
| T6            | 0.0114                       | 0.0318 | 0.0561 | 0.0857 | 0.122  | 0.1669 | 0.2169 | 0.2669 |
| T8            | 0.0084                       | 0.0233 | 0.0486 | 0.0833 | 0.1224 | 0.1665 | 0.2133 | 0.2604 |
| T9            | 0.0114                       | 0.0331 | 0.0643 | 0.0971 | 0.1327 | 0.1714 | 0.2127 | 0.2555 |
| T10           | 0.0118                       | 0.0359 | 0.0659 | 0.0996 | 0.1353 | 0.1751 | 0.2196 | 0.2653 |
| T12           | 0.0049                       | 0.0202 | 0.04   | 0.069  | 0.1061 | 0.15   | 0.1955 | 0.2412 |
| T14           | 0.0071                       | 0.0167 | 0.0339 | 0.0563 | 0.082  | 0.1184 | 0.1586 | 0.2024 |
| T16           | 0.0108                       | 0.029  | 0.0484 | 0.0727 | 0.0969 | 0.1224 | 0.151  | 0.1804 |
| Volume Change | 0.0057                       | 0.0208 | 0.0504 | 0.0873 | 0.1302 | 0.1767 | 0.2239 | 0.0057 |

(Complete Suppl, section version: : <https://dx.doi.org/10.25833/8818-b129> or <https://ncihub.org/publications/274/1>)
